# Supplementary material for: Selenium-doped hydroxyapatite biopapers with an anti-bone tumor effect by inducing apoptosis
Source: Royal Society of Chemistry journal article supplement (doi:10.1039/c9bm00953a), 2019-01-01
Supplement: c9bm00953a1.pdf [file c9bm00953a1.pdf]

## Supporting Information

### Selenium-Doped Hydroxyapatite Biopaper with Anti-Bone Tumor Effect by Inducing Apoptosis

Zi-Fei Zhou,<sup>a,#</sup> Tuan-Wei Sun,<sup>b,#</sup> Yun-Hao Qin,<sup>c,#</sup> Ying-Jie Zhu,<sup>b,\*</sup> Ying-Ying Jiang,<sup>a</sup> Yang Zhang,<sup>a</sup> Jun-Jian Liu,<sup>a</sup> Jin Wu,<sup>b</sup> Shi-Sheng He<sup>a,\*</sup> and Feng Chen<sup>a,\*</sup>

<sup>a</sup> Department of Orthopedics, Spinal Pain Research Institute, Shanghai Tenth People's Hospital, Tongji University School of Medicine, Shanghai 200072, P.R. China.

<sup>b</sup> State Key Laboratory of High Performance Ceramics and Superfine Microstructure, Shanghai Institute of Ceramics, Chinese Academy of Sciences, Shanghai 200050, P. R. China.

<sup>c</sup> Department of Orthopedics, Shanghai Jiaotong University Affiliated Sixth People's Hospital, Shanghai 200030, P.R. China.

# These authors contributed equally.

#### \*Corresponding Author

E-mail addresses: fchen@tongji.edu.cn (F. Chen); tjhss7418@tongji.edu.cn (S.S. He); y.j.zhu@mail.sic.ac.cn (Y.J. Zhu)

Supporting Figures

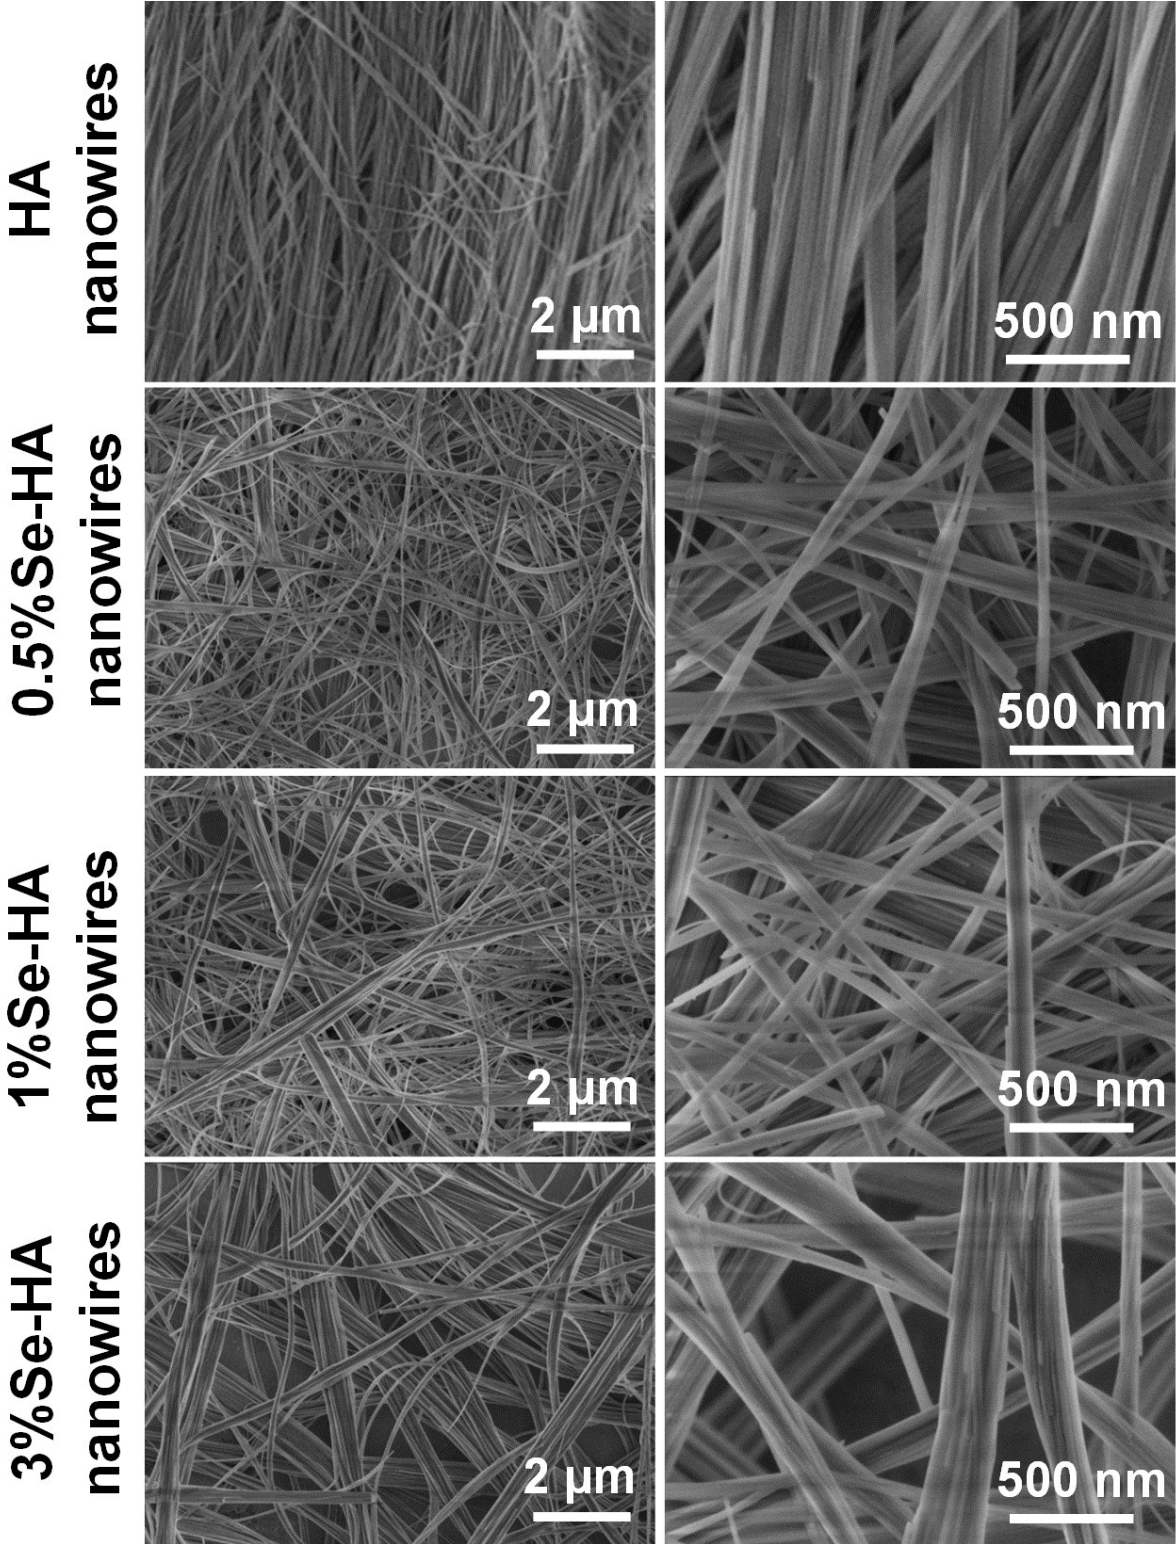

Figure S1. SEM micrographs of HA nanowires and Se-HA nanowires with different doping ratios.

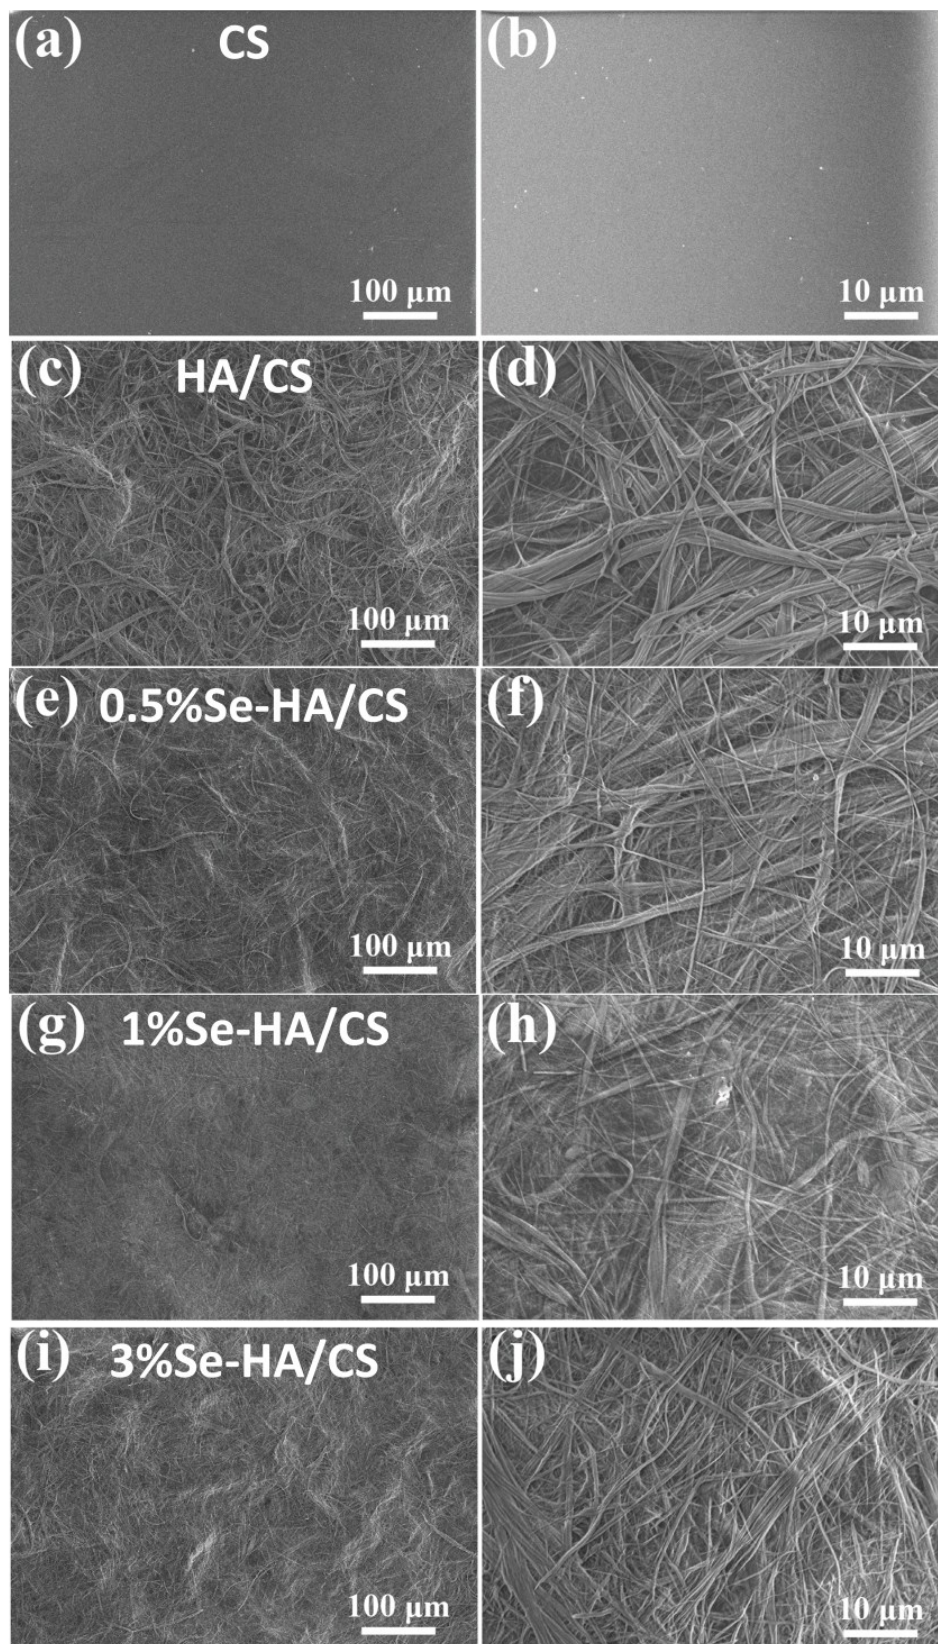

**Figure S2.** SEM micrographs of CS (a,b) , HA/CS (c,d), and Se-HA/CS (e-j) biopapers with different doping ratios.

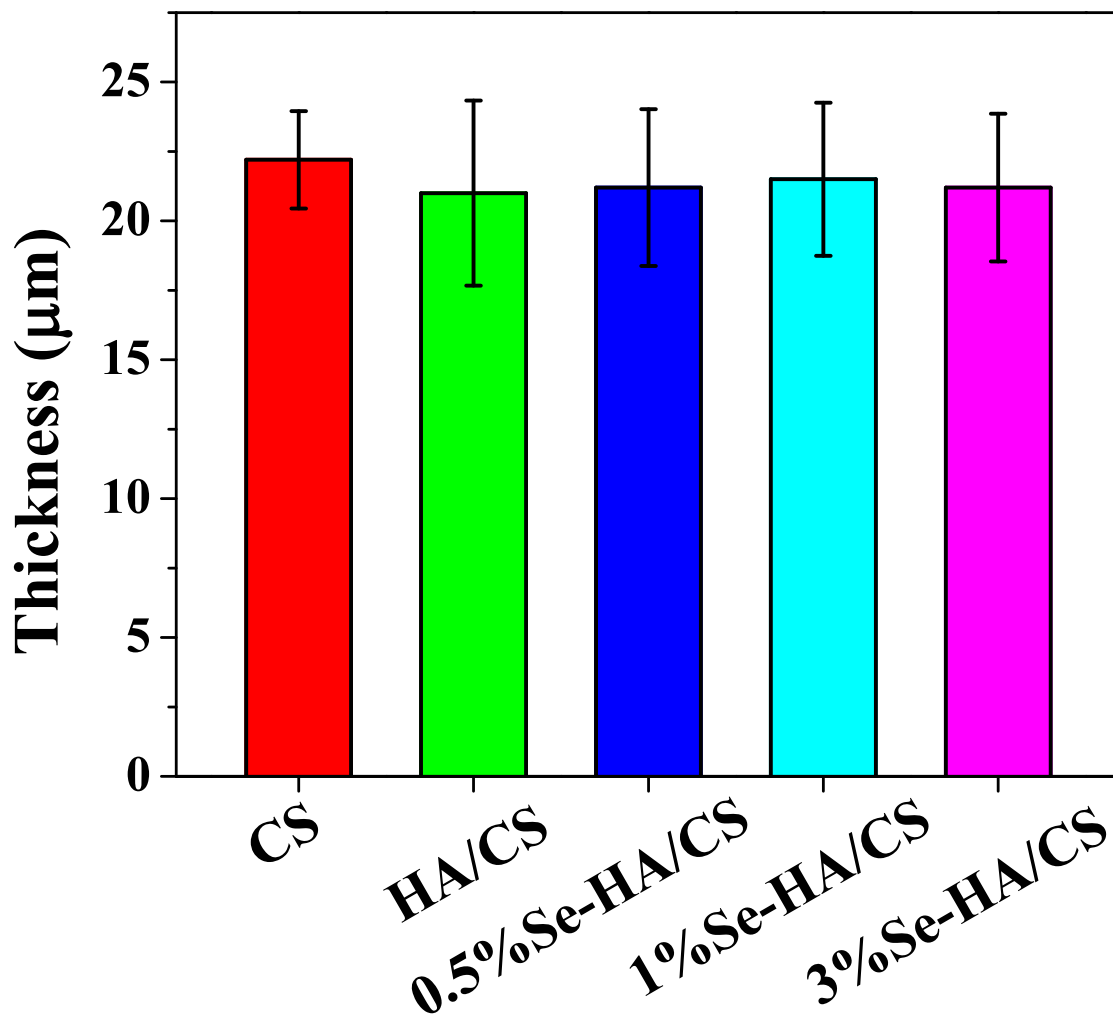

**Figure S3.** The thickness of CS, HA/CS, and Se-HA/CS biopapers with different doping ratios.

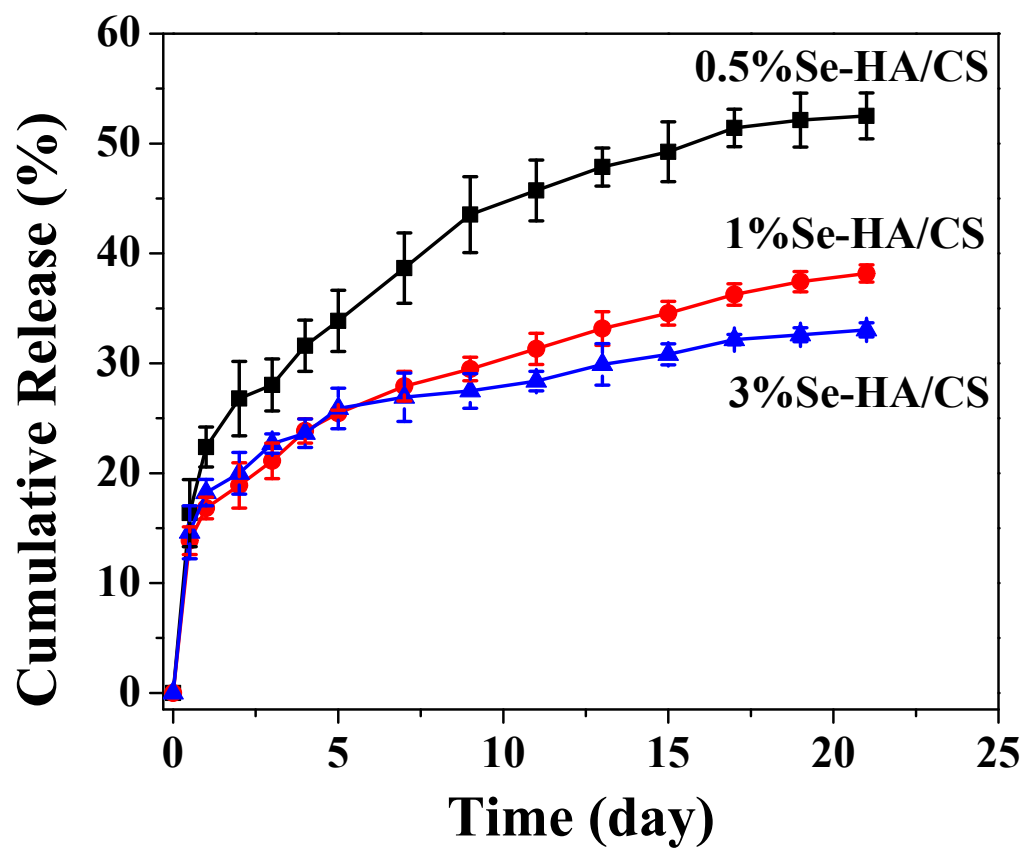

**Figure S4.** The cumulative release percentage of Se element from Se-HA/CS biopapers with different Se doping ratios.

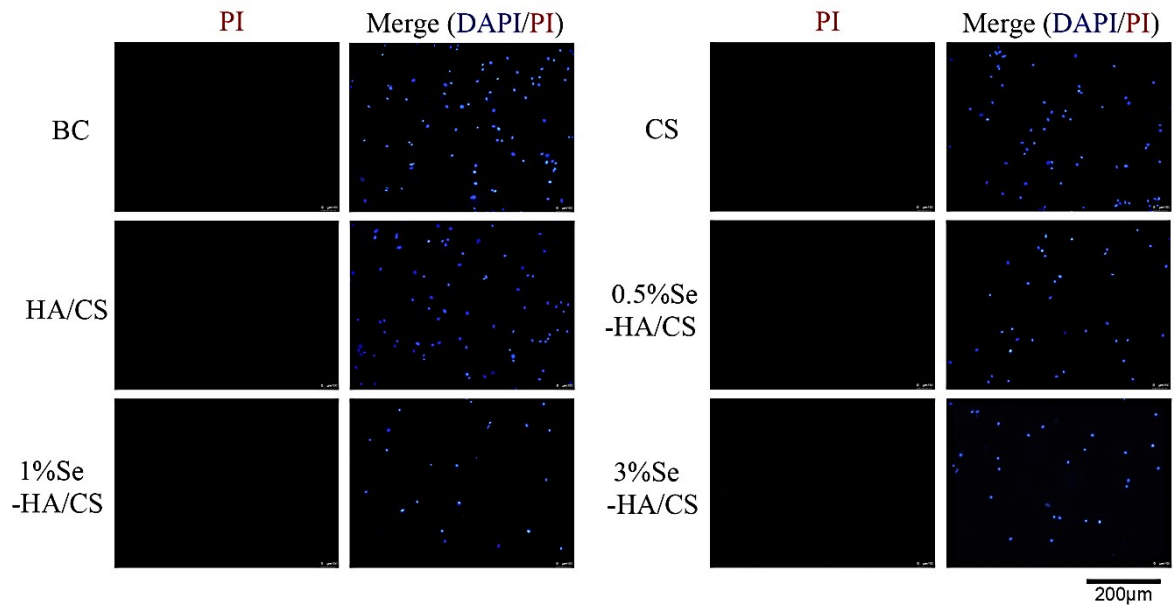

**Figure S5.** No significant apoptosis was observed in the hBMSCs cultured on blank control, CS, HA/CS, and Se-HA/CS biopapers after 48 hours.

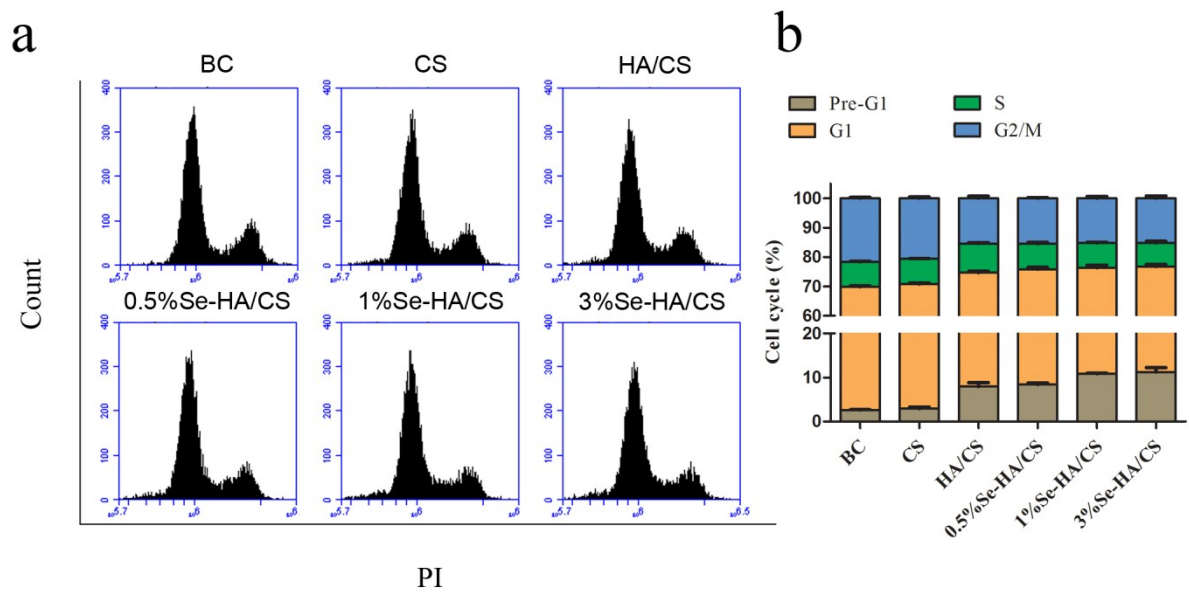

**Figure S6.** The HCS 2/8 chondrosarcoma cells incubated on Se-HA/CS biopapers show higher pre-apoptosis rate than blank control, CS and HA/CS, while there is no significant changes on the cell cycle.



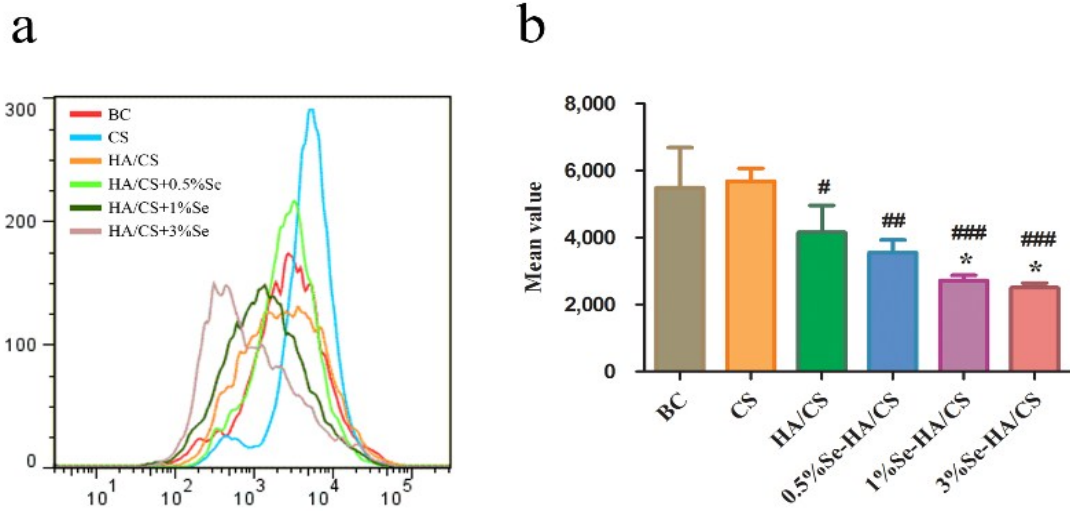

**Figure S7.** ROS levels in hBMSCs after they contact with the Se-HA/CS biopapers for two days. As the addition of HA and Se, the cellular ROS level was reduced, compared with the other BC and CS groups. \*: compared with BC group. #: compared with CS groups. \* or # :  $p < 0.05$ , ##:  $p < 0.01$ , ###:  $p < 0.005$ .
